# Supplementary material for: Combined DECS Analysis and Next-Generation Sequencing Enable Efficient Detection of Novel Plant RNA Viruses
Source: MDPI journal article supplement (doi:10.3390/v8030070), 2016-03-07
Supplement: s1 [file s1]

# Supplementary Materials: Combined DECS Analysis and Next-Generation Sequencing Enable Efficient Detection of Novel Plant RNA Viruses

Hironobu Yanagisawa <sup>1,2</sup>, Reiko Tomita <sup>3</sup>, Koji Katsu <sup>2</sup>, Takuya Uehara <sup>2</sup>, Go Atsumi <sup>3,4</sup>, Chika Tateda <sup>3</sup>, Kappei Kobayashi <sup>5</sup> and Ken-Taro Sekine <sup>3,\*</sup>

## Supplementary Procedure 1: Isolation of dsRNA Using dsRNA-Binding Protein

### 1. RNA Extraction and Purification

Total nucleic acids were extracted from a blueberry by the improved K-SDS method [22]. Briefly about 4 g scions were collected from blueberry seedlings, and crushed using a Multi-beads shocker (YASUI KIKAI CO., Osaka, Japan) for 30 s at 2,000 rpm in liquid nitrogen. Then, 8 mL of extraction buffer solution (100 mM Tris-HCl, pH 8.0, 500 mM NaCl, 1% 2-mercaptoethanol, 50 mM EDTA, pH 8.0, 3.3% Polyvinylpyrrolidone M.W. 4000) was added and centrifuged at  $2,500 \times g$ , 4 °C for 10 min. Next, 2.5 mL of homogenate was put into a 15-mL microtube and 0.2 mL 25% SDS was added and stirred well. Thereafter, it was incubated at 65 °C for 10 min, and 1.0 mL 5 M potassium acetate was added and incubated on ice for 20 min. It was centrifuged at  $13,000 \times g$ , 4 °C for 10 min, and 0.9 mL of the supernatant was added to each of the two new 1.5-mL microtubes. After adding 0.54 mL of 2-propanol to the supernatant, the solution was mixed well and incubated on ice for 10 min. It was centrifuged at  $20,000 \times g$ , 4 °C for 15 min and the supernatant was removed. Following the addition of 1 mL of 70% ethanol, the mixture was centrifuged at  $20,000 \times g$ , 4 °C for 5 min and the supernatant was removed. The total nucleic acid was dried under reduced pressure for about 3 min and then dissolved in 100  $\mu$ L RNase-free water. Next, 1 mL ISOGEN (Nippon Gene) was added to total the nucleic acid to extract total RNA according to the manufacturer's instructions. The obtained total RNA was further purified using an RNeasy Plant Minikit (Qiagen) following the manufacturer's instructions and subjected to dsRNA extraction.

### 2. Capture of Viral dsRNA

DsRNAs were captured using the GST-DRB4\* protein as previously described [5]. The nucleic acid samples were mixed with 18  $\mu$ g GST-DRB4\* in 0.8 mL dRBB (0.1 M Tris-HCl pH 7.0, 0.1 M NaCl, 10 mM MgCl<sub>2</sub>), added with glutathione-Sepharose (GE Health Care, Chalfont St. Giles, UK; suspended in dRBB containing 0.1% BSA) and incubated for 30 min. After the Sepharose beads were wash 3 times with dRBB containing 0.1% Tween 20 and twice with dRBB. Then nucleic acids bound to the beads were eluted with 100  $\mu$ L TE buffer containing 0.5% SDS and 5 mM EDTA. The eluted nucleic acids was extracted with phenol/chloroform and precipitated with ethanol. The pellet was dissolved in 20  $\mu$ L TE buffer, denatured by boiling for 5 min. and quickly chilled on ice water.

Table S1. Primer lists.

| Primer Name    | Sequence (5'-3')                                  | Sequence Position | Amplification Size (bp) |
|----------------|---------------------------------------------------|-------------------|-------------------------|
| BSSV-F1        | TTTGGTGTACCAACTGCTTAATTGC                         | 11–35             | 744                     |
| BSSV-R2        | ATTGATCACCACGCTGCATG                              | 735–754           |                         |
| BSSV-F2        | CATCACCAATCAAGCCTC                                | 518–535           | 919                     |
| BSSV-R3        | TGTCGTCGTAGTCAATCTCA                              | 1417–1436         |                         |
| BSSV-F3        | CATCACCAATCAAGCCTC                                | 1116–1133         | 1116                    |
| BSSV-R4        | GTGTCTCGGAGCAACTC                                 | 2215–2231         |                         |
| BSSV-F4        | CCCTCAATCAGATTGGCTC                               | 1706–1724         | 526                     |
| BSSV-R4        | GTGTCTCGGAGCAACTC                                 | 2215–2231         |                         |
| BSSV-F4        | CCCTCAATCAGATTGGCTC                               | 1706–1724         | 1394                    |
| BSSV-R5        | TACAATTCTCGGCCAAG                                 | 3083–3099         |                         |
| BSSV-F5        | TGTC AAGCAGGAGCCCCACC                             | 2307–2326         | 793                     |
| BSSV-R5        | TACAATTCTCGGCCAAG                                 | 3083–3099         |                         |
| BSSV-F6        | GTCCCTTG CAGTGTGGTC                               | 2911–2929         | 1118                    |
| BSSV-R6        | TGTGTTTGT CAGGCACGG                               | 4011–4028         |                         |
| BSSV-F7        | CGATGGCTGCGGCTGCGTG                               | 3509–3527         | 520                     |
| BSSV-R6        | TGTGTTTGT CAGGCACGG                               | 4011–4028         |                         |
| pET-BSSV-CP-F  | GAAGCTAGCATGGCGACCCGGCTAAG                        | 3163–3180         | 816                     |
| pET-BSSV-CP-R  | CTCGAGTCAACAGGATGAGCAACTGCCC                      | 3958–3978         |                         |
| pET-PIW-CP-F   | CATATGGCTTACACAGTTTCCAGTGCCAATC                   |                   |                         |
| pET-PIW-CP-R   | CTCGAGAGGAGTTGTAGCCCAGGTGAGTCC                    |                   |                         |
| BSSV-qF        | CCGTT CAGGACTGGGAGTTG                             | 2573–2592         | 81                      |
| BSSV-qR        | CATTCGCCGTCTCATCACATA                             | 2633–2653         |                         |
| BSSV-qP        | (FAM)-CCGACGTTGAAATGCGCATATCCCTT-(TAMRA)          | 2597–2622         |                         |
| BSSV-PosiCon-F | TAATACGACTCACTATAGGGAGATTACGAGGTGCG<br>ATTAAAGC   | 2504–2524         | 200                     |
| BSSV-PosiCon-R | TAATACGACTCACTATAGGGAGACCTGTGTTGGAAG<br>ACGGAGTTC | 2682–2703         |                         |

Table S2. Sequence identities and similarities of the putative BSSV genome compared with those of other Sobemoviruses.

|       | Full Length     | ORF1                             | ORF2a                            | ORF2b                            | ORF3                             |
|-------|-----------------|----------------------------------|----------------------------------|----------------------------------|----------------------------------|
| CoMV  | 49 <sup>a</sup> | 45 <sup>a</sup> /38 <sup>b</sup> | 49 <sup>a</sup> /31 <sup>b</sup> | 58 <sup>a</sup> /51 <sup>b</sup> | 50 <sup>a</sup> /40 <sup>b</sup> |
| CMMV  | 45              | 46/40                            | 44/28                            | 49/34                            | 47/35                            |
| IYSV  | 49              | 47/50                            | 45/29                            | 55/52                            | 46/42                            |
| LTSV  | 49              | 45/20                            | 47/29                            | 56/55                            | 46/27                            |
| RGMoV | 49              | 47/40                            | 49/83                            | 55/55                            | 45/36                            |
| RYMV  | 49              | 46/50                            | 45/33                            | 57/54                            | 45/33                            |
| SBMV  | 52              | 46/57                            | 48/34                            | 60/57                            | 48/44                            |
| SCMoV | 52              | 46/33                            | 49/35                            | 57/53                            | 47/38                            |
| SCPMV | 50              | 46/42                            | 50/45                            | 59/57                            | 51/34                            |
| SeMV  | 52              | 46/42                            | 49/71                            | 59/52                            | 50/35                            |
| SoMV  | 50              | 46/35                            | 49/31                            | 57/59                            | 46/50                            |
| TRoV  | 49              | 49/44                            | 45/33                            | 57/52                            | 46/33                            |
| VTMV  | 51              | 46/43                            | 49/30                            | 57/53                            | 48/36                            |
| PLRV  | 45              | 45/41                            | 43/37                            | 50/48                            | 45/33                            |

<sup>a</sup>: Identities of nucleic acids, <sup>b</sup>: Max identities of amino acids.
